# Supplementary material for: Social Media Analyses to Capture the Signs and Impacts of Fever Symptoms in Infants and Young Children
Source: Research Square preprint supplement (doi:10.21203/rs.3.rs-3749533/v1), 2024-01-23
Supplement: Supplementary file 1 [file 485b84f517f37fef7357a66e.docx]

Supplementary Table 1. Population Exclusion Criteria and Applied Strategy in SMA

| **Exclusion Criteria** | **Applied Strategy** |
| --- | --- |
| Primary parent/caregiver whose child was <3 months and ≥ 6 years of age at the time of the fever episode | - Posts from users who explicitly mention age <3 months and ≥6 years were excluded during the manual review process. - All other posts were included in the study. |
| Parent/caregiver whose child received antibiotics for their illness | - Posts from users reporting any of these clinical events were captured programmatically and excluded using a list of keywords for antibiotics and hospitalisation (Supplementary Table 2). |
| Parent/caregiver whose child was hospitalised for their illness for at least one night (excluding admittance to A&E) |
| Parent/caregiver of a child with serious illness or life-threatening bacterial infection (e.g., meningitis, pneumonia, sepsis, dehydration, urinary tract infection, and Kawasaki disease) | - Posts from users who explicitly reported a diagnosis of serious illness or life-threatening bacterial infection were excluded during the manual review process. |

Abbreviation: A&E = accident & emergency

**Supplementary Table 2. List of inclusion and exclusion keywords**

| **Inclusion Criteria** | **Keywords** |
| --- | --- |
| Mention of fever episode | “fever”  “feverish”  “high temperature”  “high temp”  “higher temperature”  “high body temperature”  “higher body temperature”  “burning up”  “raised temperature”  “had a temperature”  “temperature spiked”  “spiked temperature”  “spiking temperature”  “high temperatures”  “temperature came up”  “a bit of a temperature”  “mild temperature”  “degree temperature”  “degrees temperature”  “temperature was”  “temperature rising”  “raging temperature”  “temperature of [digit]”  “temperature was [digit]”  “rise in temperature”  “running a temperature”  “took his temperature”  “took her temperature” |
| Mention of child | “dd” (dear daughter)  “ds” (dear son)  “daughter”  “son”  “my”  “lb” (little boy)  “child”  “toddler”  “lo” (little one) |
| **Child Exclusion Criteria** | **Keywords** |
| Noise for fever mentions | “scarlet fever”  “hayfever”  “hay fever”  “hay-fever”  “glandular fever” |
| Receipt of antibiotics for their illness | “antibiotic” (except with previous negation, e.g., “no antibiotic”, “not given antibiotic”, etc) |
| Hospitalisation for their illness | “hospitalized”  “hospitalised”  “admitted to hospital” |

**Supplementary Figure 1.** Distribution and relative frequency of posts mentioning signs and symptoms of fever in children (N=158). Percentages refer to the proportions of posts relative to all posts mentioning signs and symptoms of fever.

**Supplementary Figure 2**. Distribution and relative frequency of posts mentioning parental management of fever. Percentages refer to the proportions of posts relative to all posts mentioning parental management of fever. A&E=accident and emergency; GP=general practitioner; NHS=National Health Service.

**Supplementary Figure 3.** Parental advice shared among forum users on social media. The size of each slice in the sunburst plot is proportional to its frequency of comments in the data. A&E=accident and emergency; GP=general practitioner; NHS=National Health Service; NICE=National Institute for Health and Care Excellence.

Supplementary Figure 1.

Supplementary Figure 2.


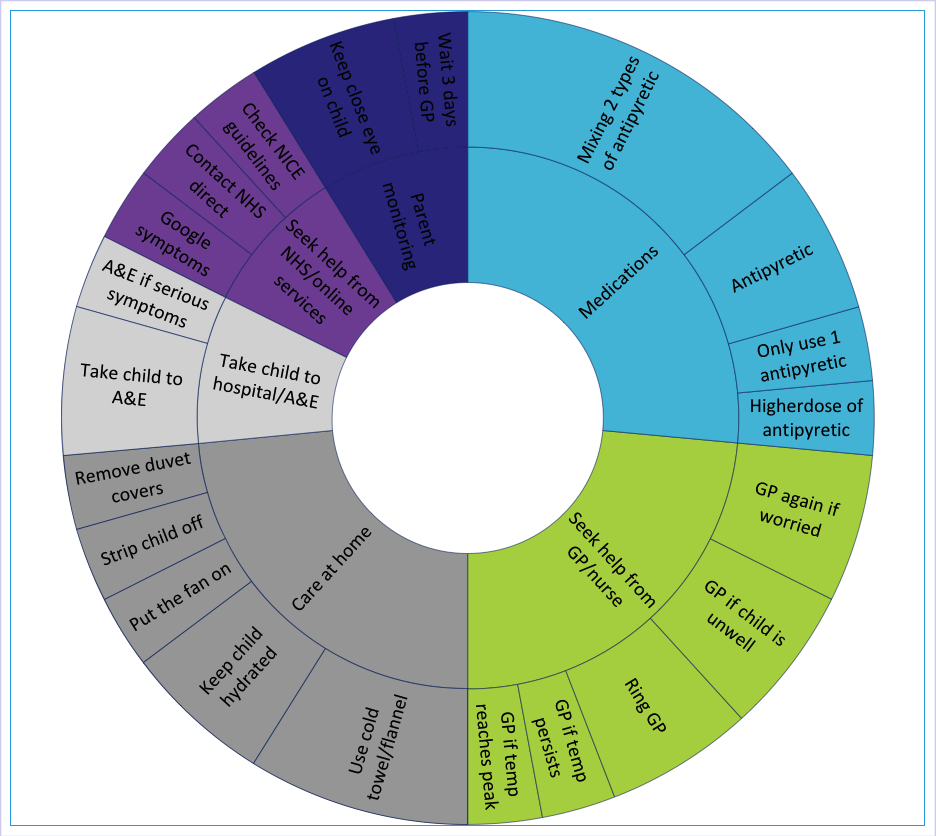


Supplementary Figure 3.
